# Supplementary material for: Magnesium Isoglycyrrhizinate Reduces the Target-Binding Amount of Cisplatin to Mitochondrial DNA and Renal Injury through SIRT3
Source: MDPI journal article supplement (doi:10.3390/ijms232113093), 2022-10-28
Supplement: s1 [file s1]

## Supplement Figure S1

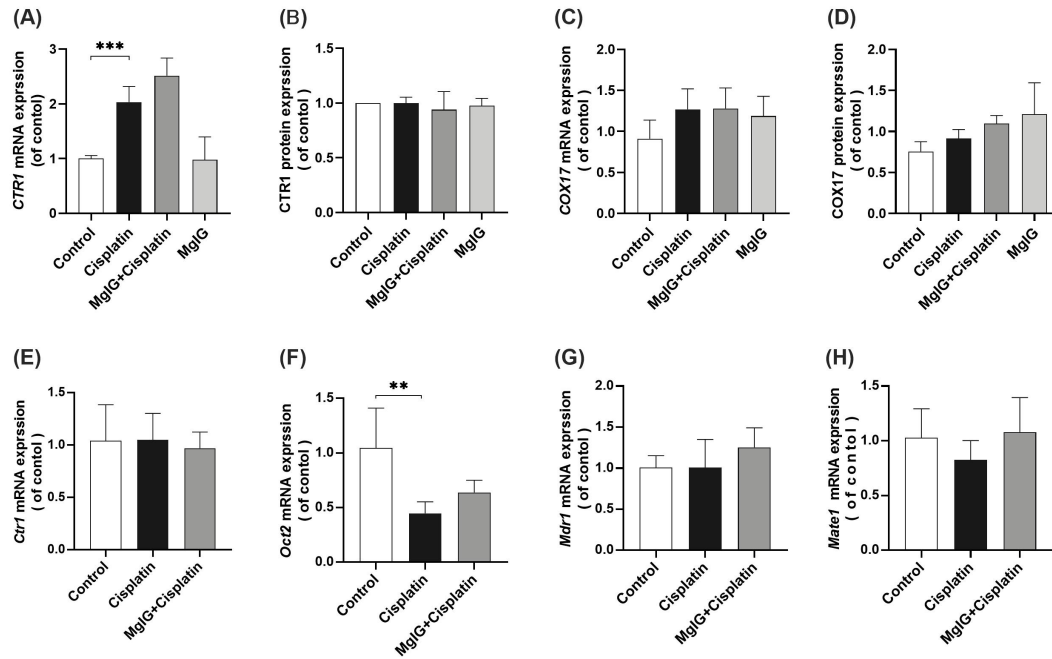

**The effect of MgIG on cisplatin-associated transporters in HK-2 cells.** **A-B** The mRNA and protein expression of CTR1 in HK-2 cells. **C-D** The mRNA and protein expression of COX17 in HK-2 cells. MgIG has no effect on the mRNA and protein expression of CTR1 and COX17 in HK-2 cells. **E-H** The mRNA expression of *Ctr1*, *Oct2*, *Mdr1*, *Mate1* in mice kidneys. MgIG has no effect on the mRNA expression of *Ctr1*, *Oct2*, *Mdr1*, *Mate1* in mice kidneys. The data are presented as the mean  $\pm$  SD,  $n = 6$ . \*\*  $P < 0.01$ , \*\*\*  $P < 0.001$ .

## Supplement Figure S2

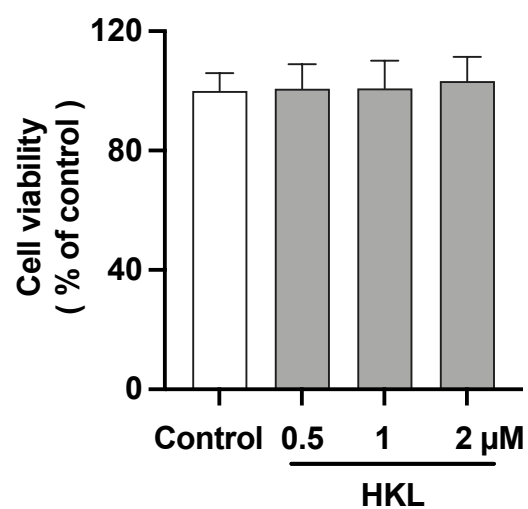

**The effect of HKL on cell viability of HK-2 cells.** With co-administration of HKL at 0.5, 1, and 2  $\mu$ M for 48h, the cell viability appeared no change. The data are presented as the mean  $\pm$  SD, n = 6.

## Supplement Table S1

**Table S1 Detective parameters**

| Compound | Detection<br>mode | DP   | CE  | Quantitative<br>ion pairs | Retention<br>time |
|----------|-------------------|------|-----|---------------------------|-------------------|
| NAM      | +                 | 60   | 25  | 123.3 / 80.0              | 2.13              |
| NR       | +                 | 40   | 17  | 255.2 / 123.1             | 3.04              |
| NMN      | +                 | 50   | 20  | 335.2 / 123.0             | 7.44              |
| NADPH    | -                 | -190 | -50 | 744.0 / 408.0             | 6.66              |

## Supplement Table S2

**Table S2. The primer sequences of RT-PCR.**

|                   | <b>Forward Primer (5'-3')</b> | <b>Reverse Primer (5'-3')</b> |
|-------------------|-------------------------------|-------------------------------|
| <i>Mus Actb</i>   | ACGGCCAGGTCATCACTATTG         | AGGGGCCGGACTCATCGTA           |
| <i>Mus Kim-1</i>  | AGCAGTCGGTACAACCTAAAGG        | ACTCGACAACAATACAGACCAC        |
| <i>Mus Ng2</i>    | TGGCCCTGAGTGTCATGTG           | CTCTTGCTAGCTCATAGATGGTGC      |
| <i>Mus Ctr1</i>   | CATGATGATGATGCCTATGACC        | CAGCATCTGCTGCCCCAAC           |
| <i>Mus Oct2</i>   | GGGTTCTCATGGCGATTTCAC         | GCCCAGCCCCAACAAATTCTG         |
| <i>Mus Mdr1</i>   | TCGACCCACACTTCAGCTACA         | AGCCGGTTGTCCATGTTGG           |
| <i>Mus Mate1</i>  | GTTGGCCTTACGGAGAGGAC          | AATCCCACCCACCAAGACTAA         |
| <i>Homo ACTB</i>  | ACGGCCAGGTCATCACTATTG         | AGGGGCCGGACTCATCGTA           |
| <i>Homo SIRT3</i> | GGCTCTATACACAGAACATCGAC       | TAGCTGTTACAAAGGTCCCGT         |
| <i>Homo CTR1</i>  | AAGGACTCAAGATAGCCCGAG         | TGGGACAGGCATGGAATTGTA         |
| <i>Homo COX17</i> | GGCTCTATACACAGAACATCGAC       | TAGCTGTTACAAAGGTCCCGT         |
